# Supplementary material for: Citalopram, Methylphenidate, or Their Combination in Geriatric Depression: A Randomized, Double-Blind, Placebo-Controlled Trial
Source: Atypon-hosted journal article supplement (doi:10.1176/appi.ajp.2014.14070889), 2015-02-13
Supplement: appi.ajp.2014.14070889.ds001.pdf [file appi.ajp.2014.14070889.ds001.pdf]

**FIGURE S1. Plot of predicted scores on the 24-item Hamilton Depression Rating Scale by treatment group over time (using different slopes from baseline to week 4 and then from week 4 to week 16)**

*Citalopram=CIT; Methylphenidate=MPH; Placebo=PBO*

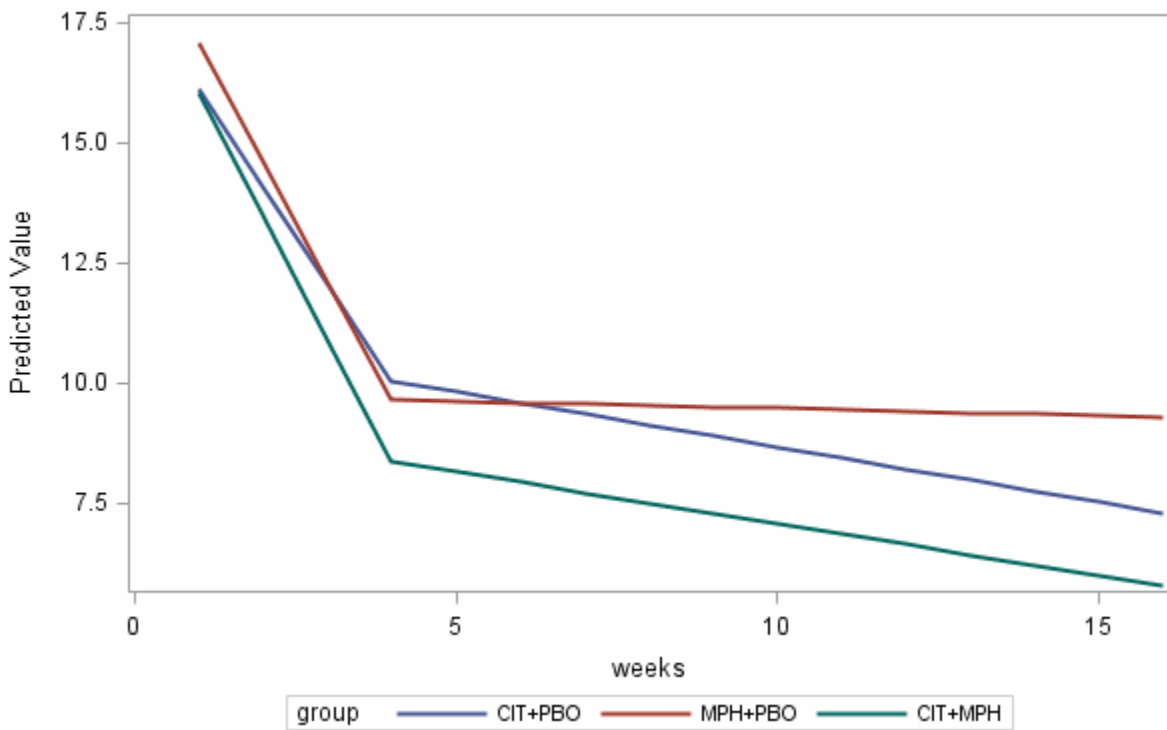

**TABLE S1. Estimated effect sizes**

| Variable                                     | CIT+PBO<br>(N=48) | MPH+PBO<br>(N=48) | CIT+MPH<br>(N=47) |
|----------------------------------------------|-------------------|-------------------|-------------------|
| <b><i>Psychiatric Symptoms</i></b>           |                   |                   |                   |
| HAM-D*                                       | -2.93             | -2.23             | -3.35             |
| Montgomery-Åsberg Depression Rating Scale    | -2.44             | -1.62             | -2.64             |
| Apathy Evaluation Scale                      | 0.98              | 0.75              | 0.95              |
| <b><i>Health-related quality of life</i></b> |                   |                   |                   |
| Short Form 36-Item Health Survey             |                   |                   |                   |
| Energy                                       | 0.78              | 0.81              | 1.09              |
| Well-being                                   | 1.50              | 0.81              | 1.57              |
| Role-emotional                               | 0.93              | 0.84              | 1.40              |

Note: \*HAM-D=24-item Hamilton Depression Rating Scale

Citalopram=CIT; Methylphenidate=MPH; Placebo=PBO

**TABLE S2. Adverse effects profile**

|                              | Citalopram<br>+ Placebo |      | Methylphenidate<br>+ Placebo |      | Citalopram +<br>Methylphenidate |      |
|------------------------------|-------------------------|------|------------------------------|------|---------------------------------|------|
|                              | N                       | %    | N                            | %    | N                               | %    |
| No. randomized               | 48                      |      | 47                           |      | 48                              |      |
| No. with adverse event data  | 44                      |      | 42                           |      | 40                              |      |
| No. serious adverse events   | 1                       |      | 0                            |      | 0                               |      |
| Adverse events collected (%) |                         |      |                              |      |                                 |      |
| Concentration difficulties   | 0                       |      | 5                            | 11.9 | 3                               | 7.5  |
| Asthenia                     | 0                       |      | 1                            | 2.4  | 4                               | 10.0 |
| Sedation                     | 6                       | 13.6 | 1                            | 2.4  | 3                               | 7.5  |
| Failing memory               | 3                       | 6.8  | 3                            | 7.1  | 3                               | 7.5  |
| Depression                   | 1                       | 2.3  | 1                            | 2.4  | 1                               | 2.5  |
| Tension                      | 6                       | 13.6 | 7                            | 1.7  | 2                               | 13.3 |
| Increased duration of sleep  | 4                       | 9.1  | 4                            | 9.5  | 1                               | 2.5  |
| Decreased duration of sleep  | 9                       | 20.5 | 10                           | 23.8 | 7                               | 17.5 |
| Increased dream activity     | 1                       | 2.3  | 2                            | 4.8  | 0                               |      |
| Akinesia                     | 0                       |      | 1                            | 2.4  | 0                               |      |
| Tremor                       | 0                       |      | 1                            | 2.4  | 3                               | 7.5  |
| Akathisia                    | 0                       |      | 1                            | 2.4  | 0                               |      |
| Paraesthesias                | 0                       |      | 2                            | 4.8  | 0                               |      |
| Increased salivation         | 0                       |      | 1                            | 2.4  | 1                               | 2.5  |
| Reduced salivation           | 3                       | 6.8  | 4                            | 9.5  | 9                               | 22.5 |
| Nausea                       | 9                       | 20.5 | 8                            | 19.0 | 13                              | 32.5 |
| Diarrhea                     | 5                       | 11.4 | 4                            | 9.5  | 4                               | 10.0 |
| Constipation                 | 4                       | 9.1  | 0                            |      | 4                               | 10.0 |
| Polyuria                     | 1                       | 2.3  | 3                            | 7.1  | 4                               | 10.0 |
| Orthostatic dizziness        | 2                       | 4.5  | 1                            | 2.4  | 3                               | 7.5  |
| Palpitations                 | 0                       |      | 2                            | 4.8  | 1                               | 2.5  |
| Increased perspiration       | 1                       | 2.3  | 3                            | 7.1  | 1                               | 2.5  |
| Rash – general               | 2                       | 4.5  | 2                            | 4.8  | 1                               | 2.5  |
| Rash – psoriatic             | 0                       |      | 1                            | 2.4  | 1                               | 2.5  |
| Rash – cannot be classified  | 2                       | 4.5  | 1                            | 2.4  | 0                               |      |
| Increased pigmentation       | 1                       | 2.3  | 0                            |      | 0                               |      |
| Weight gain                  | 4                       | 9.1  | 0                            |      | 0                               |      |
| Weight loss                  | 1                       | 2.3  | 1                            | 2.4  | 1                               | 2.5  |
| Diminished sexual desire     | 1                       | 2.3  | 2                            | 4.8  | 2                               | 5.0  |
| Erectile dysfunction         | 0                       |      | 1                            | 2.4  | 0                               |      |
| Ejaculatory dysfunction      | 0                       |      | 0                            |      | 1                               | 2.5  |
| Orgastic dysfunction         | 0                       |      | 1                            | 2.4  | 1                               | 2.5  |
| Dry vagina                   | 1                       | 2.3  | 0                            |      | 0                               |      |
| Headache – migraine          | 6                       | 13.6 | 2                            | 4.8  | 3                               | 7.5  |
| Headache – tension           | 2                       | 4.5  | 0                            |      | 0                               |      |

*Note:* None of the group comparisons were statistically significant.
